# Supplementary material for: Synthesis of a WO3 photocatalyst with high photocatalytic activity and stability using synergetic internal Fe3+ doping and superficial Pt loading for ethylene degradation under visible-light irradiation
Source: Royal Society of Chemistry journal article supplement (doi:10.1039/c8cy02375a), 2018-12-20
Supplement: c8cy02375a1.pdf [file c8cy02375a1.pdf]

## Supplementary material

### Synthesis of synergetic internal Fe<sup>3+</sup> doped and superficial Pt loaded WO<sub>3</sub> nanostructures with high photocatalytic activity and stability for ethylene degradation under visible light irradiation

Xiaolei Liu,<sup>‡a</sup> Huishan Zhai,<sup>‡a</sup> Peng Wang,<sup>a</sup> Qianqian Zhang,<sup>\*a</sup> Zeyan Wang,<sup>a</sup> Yuanyuan Liu,<sup>a</sup> Ying Dai,<sup>b</sup> Baibiao Huang,<sup>\*a</sup> Xiaoyan Qin<sup>a</sup> and Xiaoyang Zhang<sup>a</sup>

<sup>a</sup> State key lab of crystal materials, Shandong university, Jinan 250100, China

<sup>b</sup> School of physics, Shandong university, Jinan, 250100, China

\*Corresponding authors e-mail addresses: pengwangicm@sdu.edu.cn (P. Wang),  
bbhuang@sdu.edu.cn (B. B. Huang).

<sup>‡</sup>The authors contributed equally to this work.

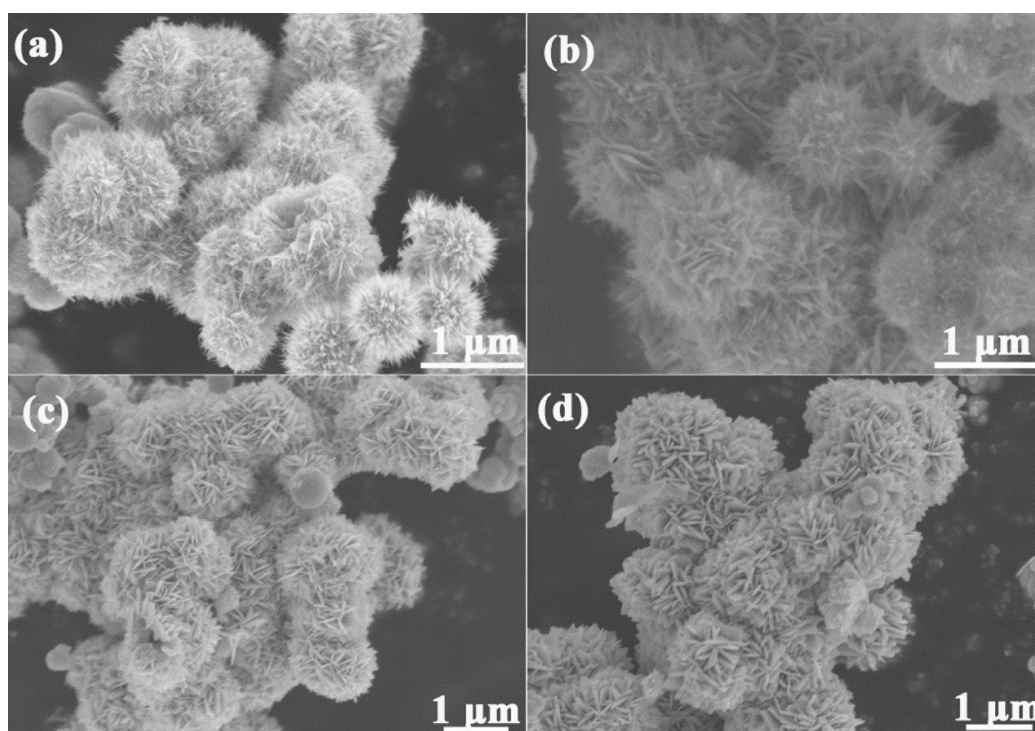

**Fig. S1.** SEM image of the as-synthesized urchin-like  $\text{WO}_{2.72}$  architectures calcined at (a) 350 °C, (b) 400 °C, (c) 450 °C, (d) 500 °C.

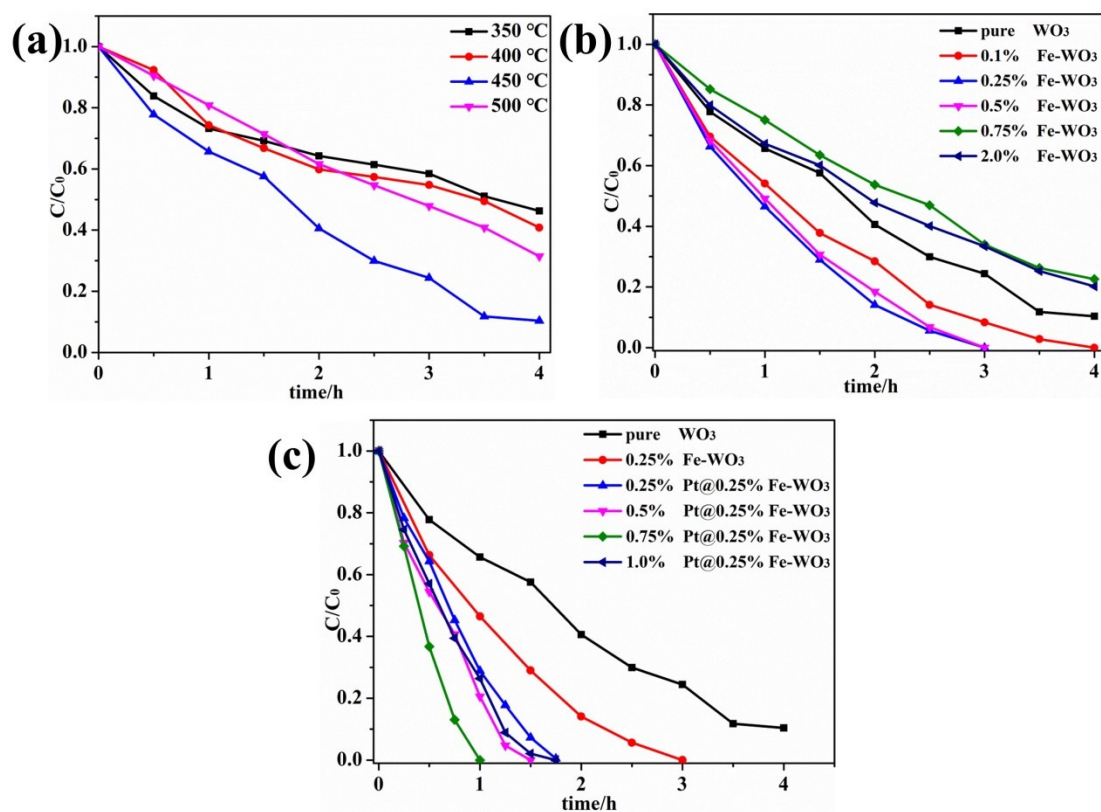

**Fig. S2.** Photocatalytic degradation of ethylene by (a) pure  $\text{WO}_3$  under different temperature, (b)  $\text{WO}_3$  doped with different amounts of Fe and (c) 0.25 mol% Fe- $\text{WO}_3$  with different amount of Pt under the irradiation of full spectrum light.

**Table S1** The comparison of photocatalytic C<sub>2</sub>H<sub>4</sub> degradation activity of different photocatalysts.

| photocatalyst                                                      | concentration of C <sub>2</sub> H <sub>4</sub> (ppm) | amount of catalyst (g) | light source                                      | performance                                                                       | reference        |
|--------------------------------------------------------------------|------------------------------------------------------|------------------------|---------------------------------------------------|-----------------------------------------------------------------------------------|------------------|
| 0.75 wt% Pt@0.25 mol% Fe-WO <sub>3</sub>                           | 1250                                                 | 0.4                    | 300 W Xe lamp (visible light, $\lambda > 420$ nm) | after 4 h light irradiation, it can be degrade completely                         | <b>This work</b> |
| 0.75 wt% Pt@0.25 mol% Fe-WO <sub>3</sub>                           | 1250                                                 | 0.4                    | 300 W Xe lamp full spectrum irradiation           | after 1 h light irradiation, it can be degrade completely                         | <b>This work</b> |
| BiVO <sub>4</sub> /P25                                             | 1500                                                 | 1                      | 500 W Xe lamp (visible light, $\lambda > 400$ nm) | after 6 h light irradiation, only 7.56% C <sub>2</sub> H <sub>4</sub> is degraded | [1]              |
| In <sub>2</sub> O <sub>3</sub> -Ag-Ag <sub>3</sub> PO <sub>4</sub> | 200                                                  | 0.2                    | 300 W Xe lamp (visible light, $\lambda > 420$ nm) | after 2 h light irradiation, it can be degrade completely                         | [2]              |
| Pt-TiO <sub>2</sub> nanosheets                                     | 200                                                  | 0.1                    | 300 W Xe lamp (visible light, $\lambda > 420$ nm) | after 12 min light irradiation, it can be degrade completely                      | [3]              |
| AuAg/ZnO                                                           | 1250                                                 | 0.12                   | 300 W Xe lamp full spectrum irradiation           | after 1 h light irradiation, it can be degrade completely                         | [4]              |
| Ag/ZnO                                                             | 2500                                                 | 0.5                    | 300 W Xe lamp full spectrum irradiation           | after 2.5 h light irradiation, it can be degrade completely                       | [5]              |

[1] X. L. Song, Y. Y. Li, Z. D. Wei, S. Y. Ye, D. D. Dionysiou, Chemical Engineering Journal, 2017, 314, 443-452.

[2] X. X. Chen, R. Li, X. Y. Pan, X. T. Huang, Z. G. Yi, Chemical Engineering Journal, 2017, 320, 644-652.

[3] X. Y. Pan, X. X. Chen, Z. G. Yi, ACS Appl. Mater. Interfaces, 2016, 8, 10104–10108.

[4] H. S. Zhai, P. Wang, Q. Q. Zhang, X. L. Liu, Z. Y. Wang, Y. Y. Liu, Z. K. Zheng, B. B. Huang, accepted manuscript, DOI: <https://doi.org/10.1016/j.apcata.2018.06.019>.

[5] X. L. Zhu, X. Z. Liang, P. Wang, Y. Dai, B. B. Huang, Applied Surface Science 456 (2018) 493–500.
